# Supplementary material for: The checkpoint inhibitor PD-1H/VISTA controls osteoclast-mediated multiple myeloma bone disease
Source: PubMed Central journal article supplement (PMC10352288; doi:10.1038/s41467-023-39769-8), 2023-07-17
Supplement: 41467_2023_39769_MOESM2_ESM.pdf [file 41467_2023_39769_MOESM2_ESM.pdf]

## Description of Additional Supplementary Files

**Supplementary Data 1.** MMP-13-His6 pulldown data collected on the Synapt G2 HDMS mass 4 spectrometer. 5 6

**Supplementary Data 2.** List of 28 peptides that have been identified from the bait pro-MMP-13 7 protein by MS. 8 9

**Supplementary Data 3.** PD-1H-His6 pulldown data collected on the Q Exactive HF mass 10 spectrometer.
